# Supplementary material for: Efficient conversion of furfuryl alcohol to ethyl levulinate with sulfonic acid-functionalized MIL-101(Cr)
Source: Royal Society of Chemistry journal article supplement (doi:10.1039/c6ra19116a), 2016-01-01
Supplement: c6ra19116a1.pdf [file c6ra19116a1.pdf]

## Supplementary Materials

### **Efficient conversion of furfuryl alcohol to ethyl levulinate with sulfonic acid-functionalized MIL-101(Cr)**

Xiao-Fang Liu, Hu Li, Heng Zhang, Hu Pan, Shan Huang, Kai-Li Yang and Song Yang\*<sup>a,b</sup>

*a State Key Laboratory Breeding Base of Green Pesticide and Agricultural Bioengineering, State-Local Joint Laboratory for Comprehensive Utilization of Biomass, Center for Research and Development of Fine Chemicals, Guizhou University, Guiyang 550025, China.*

*b School of Pharmacy, East China University of Science & Technology, Shanghai 200237, China.*

## Table contents

**Fig. S1.** EL yield profiles of the reaction solution (a) with MIL-101(Cr)-SO<sub>3</sub>H catalyst or (b) without MIL-101(Cr)-SO<sub>3</sub>H catalyst

**Scheme S1** Proposed reaction pathway for the acid-catalyzed conversion of furfuryl alcohol to ethyl levulinate in EtOH.

**Fig. S2.** The intermediates and byproducts identified by GC-MS during the course of the one-pot ethanolysis reaction.

**Table S1** The intermediates and byproducts identified by GC-MS during the course of the one-pot ethanolysis reaction.

**Fig. S3.** GC-MS spectra of the intermittent sampling reaction mixture

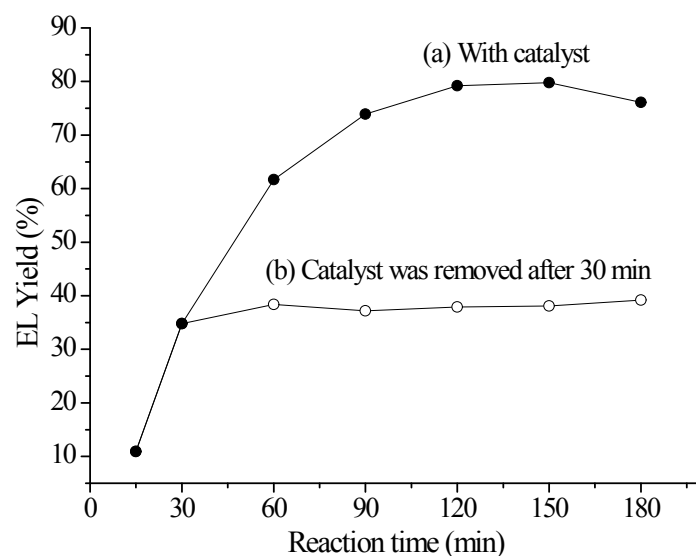

**Fig. S1.** EL yield profiles of the reaction solution (a) with MIL-101(Cr)-SO<sub>3</sub>H catalyst or (b) without MIL-101(Cr)-SO<sub>3</sub>H catalyst (filtrated after 30 min). (Reaction conditions: molar ratio of FA to EtOH = 1:60, MIL-101(Cr)-SO<sub>3</sub>H (100 mg), 140 °C)

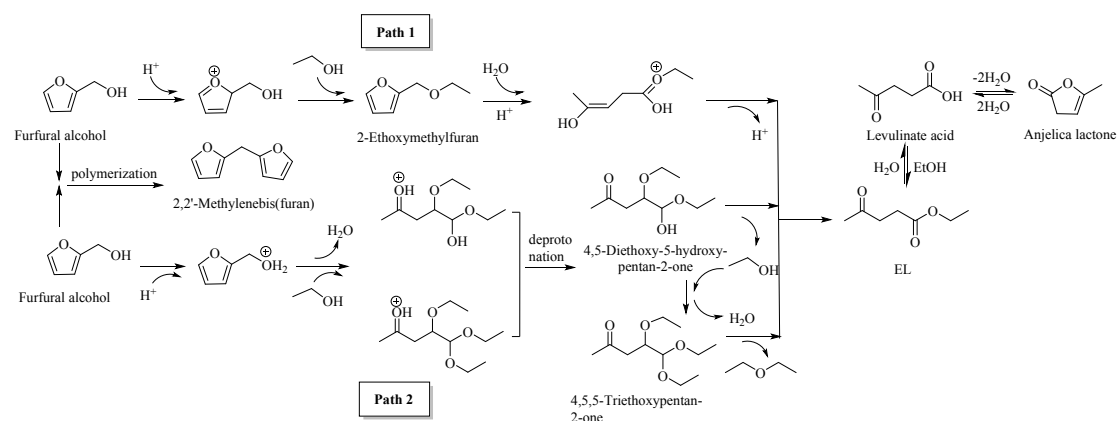

**Scheme S1** Proposed reaction pathway for the acid-catalyzed conversion of furfuryl

alcohol to ethyl levulinate in EtOH.

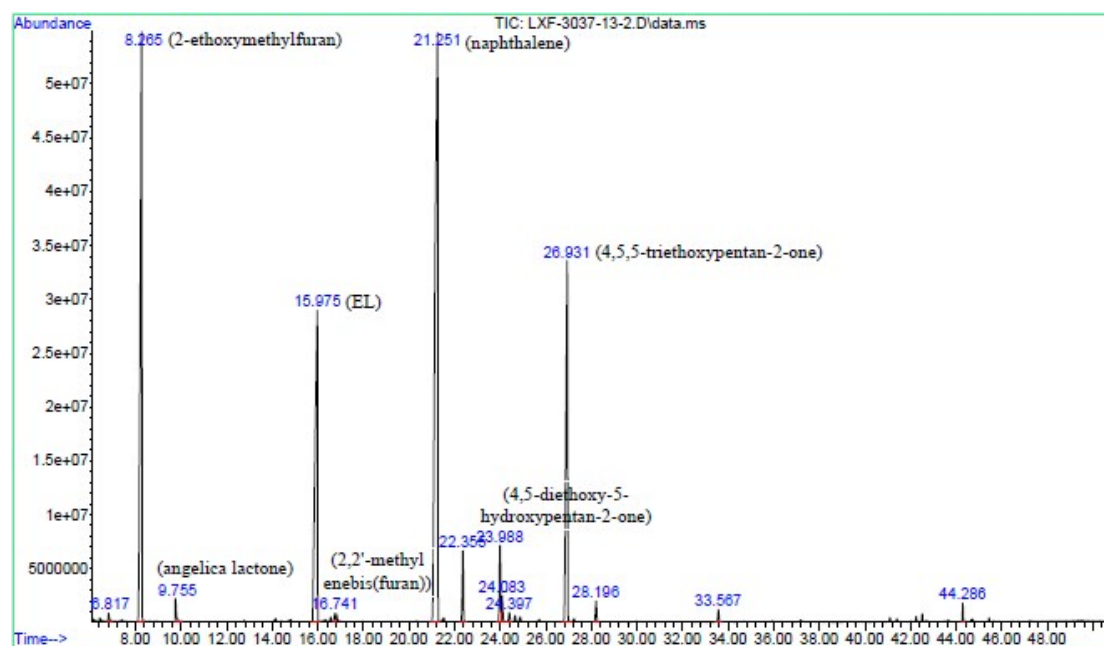

**Fig. S2.** The intermediates and byproducts identified by GC-MS during the course of the one-pot ethanolysis reaction. (Reaction conditions: molar ratio of FA to EtOH =1:60, MIL-101(Cr)-SO<sub>3</sub>H (100 mg), 120 °C)

**Table S1** The intermediates and byproducts identified by GC-MS during the course of the one-pot ethanolysis reaction. (Reaction conditions: molar ratio of FA to EtOH =1:60, MIL-101(Cr)-SO<sub>3</sub>H (100 mg), 120 °C)

| Molecular structure | Name of compound                         | Retention time | Products     | Relative amount (%) |
|---------------------|------------------------------------------|----------------|--------------|---------------------|
|                     | Ethyl levulinate                         | 15.975         | Main product | 28.8                |
|                     | 2-(Ethoxymethyl)furan (2-EMF)            | 8.265          | Intermediate | 36.9                |
|                     | 4,5,5-Triethoxypentan-2-one (TEP)        | 26.931         | Intermediate | 22.7                |
|                     | 4,5-Diethoxy-5-hydroxypentan-2-one (DHP) | 23.988         | Intermediate | 3.5                 |
|                     | Angelica lactone                         | 9.755          | Byproduct    | 1.0                 |
|                     | 2,2'-Methylenebis(furan)                 | 16.741         | Byproduct    | 0.3                 |

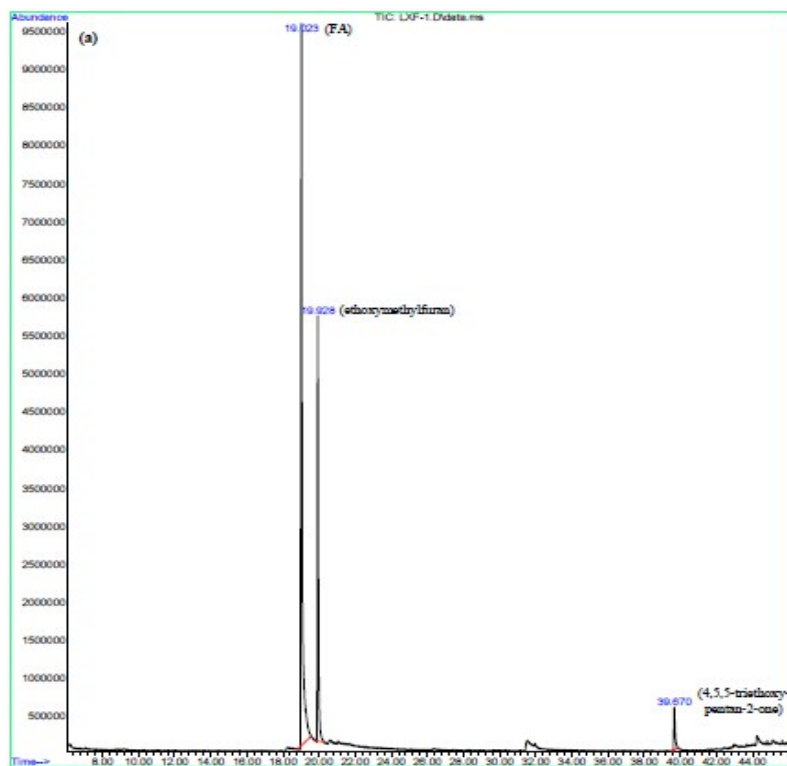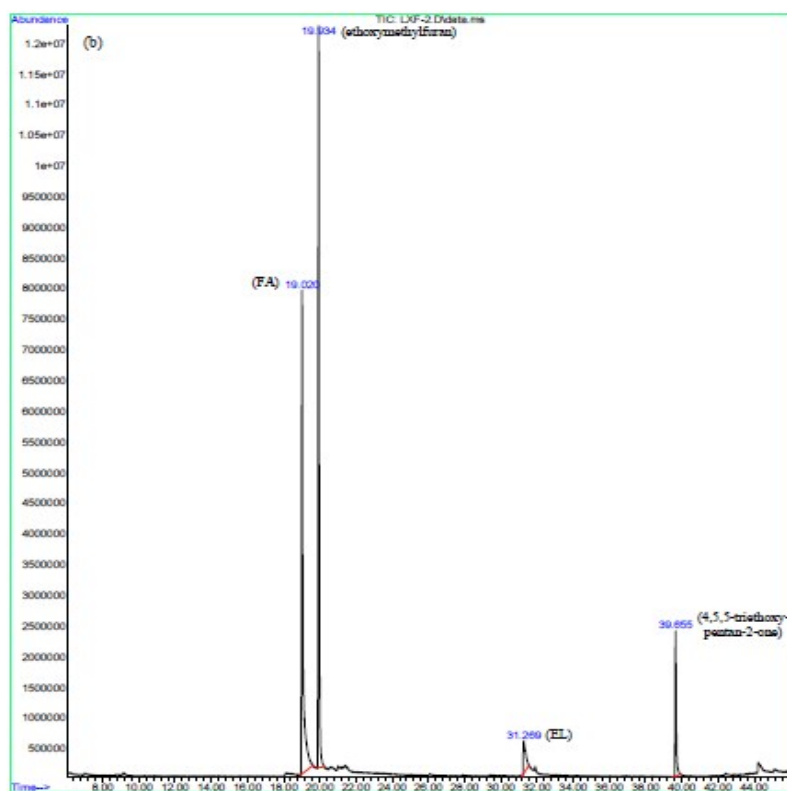

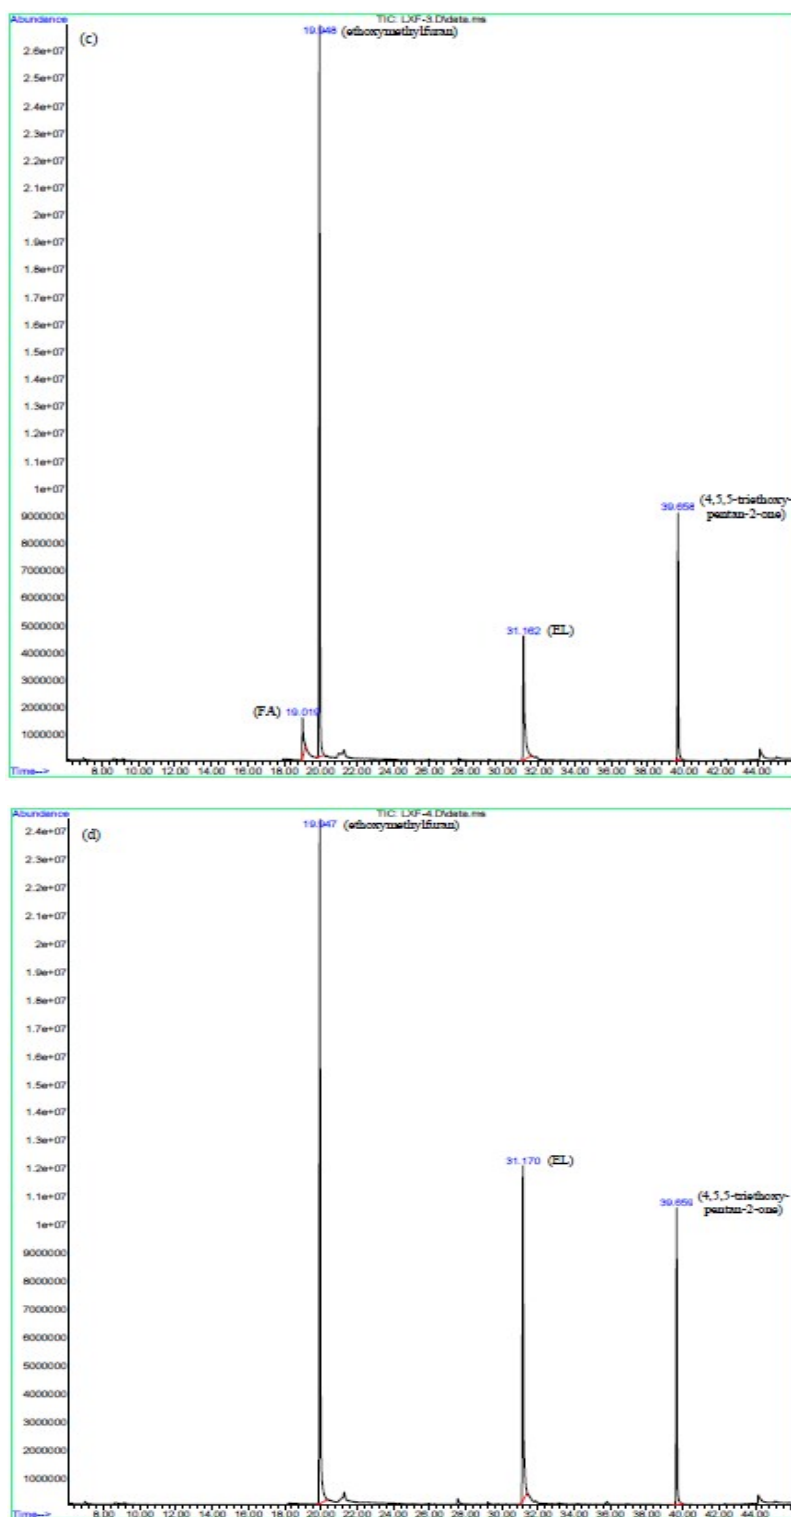

**Fig. S3.** GC-MS spectra of the intermittent sampling reaction mixture: GC spectrum with main retention time at 120 °C for 15 min (a), GC spectrum with main retention time at 120 °C for 30 min (b), GC spectrum with main retention time at 120 °C for 60 min (c), GC spectrum with main retention time at 120 °C for 120 min (d). (Reaction conditions: molar ratio of FA to EtOH =1:60, MIL-101(Cr)-SO<sub>3</sub>H (100 mg), 120 °C)
